# Supplementary material
Source: publisher figshare collection journal article supplement (https://sage.figshare.com/ndownloader/files/12753587)
Supplement: Supplementary file 1 [file 12753587]

Legend: Level 1 SOB = mild dyspnoea, Level 2 SOB = moderate dyspnoea, Level 3 SOB = severe dyspnoea

Supplementary Figure – Survivability by dyspnoea severity
